# Supplementary material for: In Vitro Infant Faecal Fermentation of Low Viscosity Barley β-Glucan and Its Acid Hydrolyzed Derivatives: Evaluation of Their Potential as Novel Prebiotics
Source: MDPI journal article supplement (doi:10.3390/molecules24050828), 2019-02-26
Supplement: s1 [file s1]

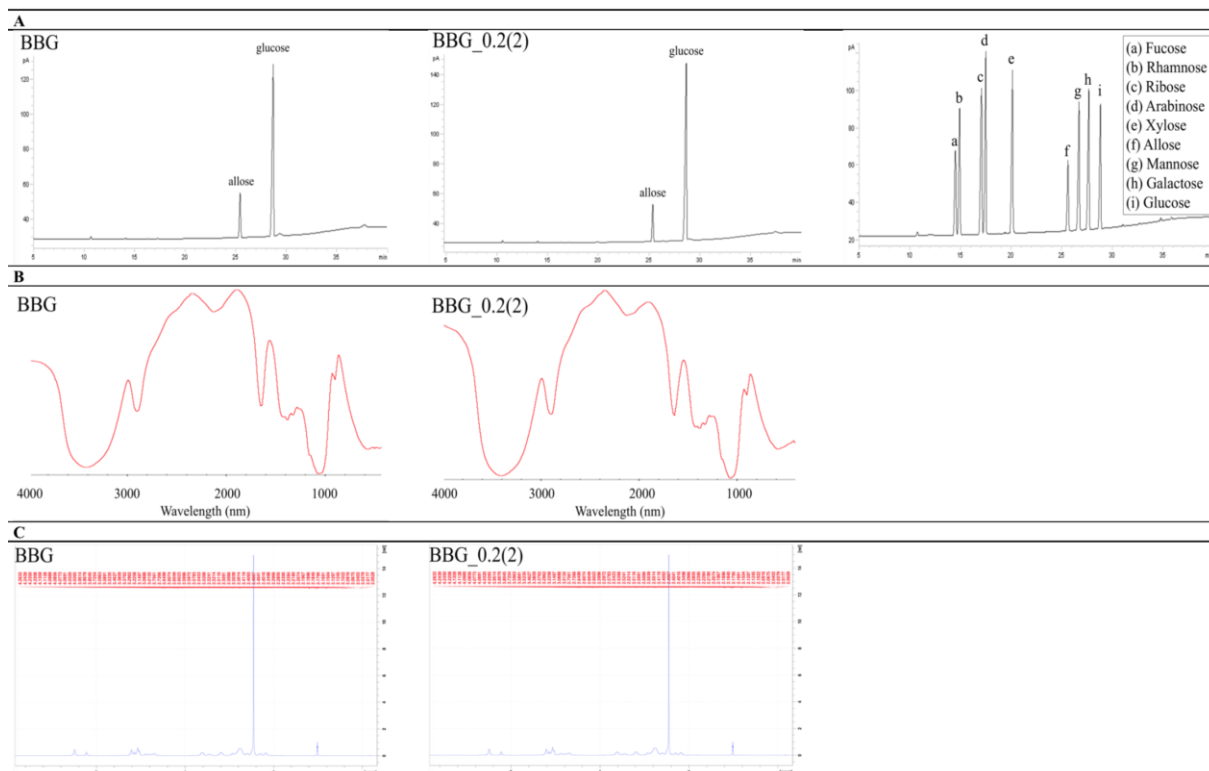

**Figure 1.** (A) GC monosaccharide profile; (B) FTIR spectrum; and (C) NMR  $^1\text{H}$  spectrum of BBG and BBG\_0.2(2).

| Samples  | Representative plate of fermentation mixture after 40 h                             | Samples    | Representative plate of fermentation mixture after 40 h                              |
|----------|-------------------------------------------------------------------------------------|------------|--------------------------------------------------------------------------------------|
| BBG      | 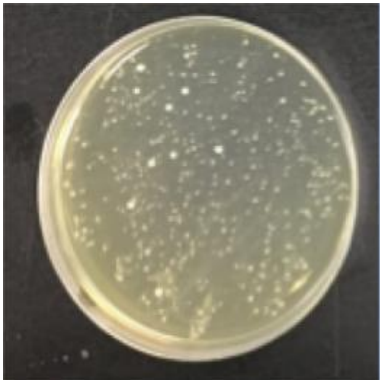   | BBG_0.2    |    |
| BBG_0.05 |   | BBG_0.2(2) |   |
| BBG_0.1  |  | Glucose    |  |

**Figure 2.** Representative bacterial total plate count of the 5 BBG samples and glucose monomer.

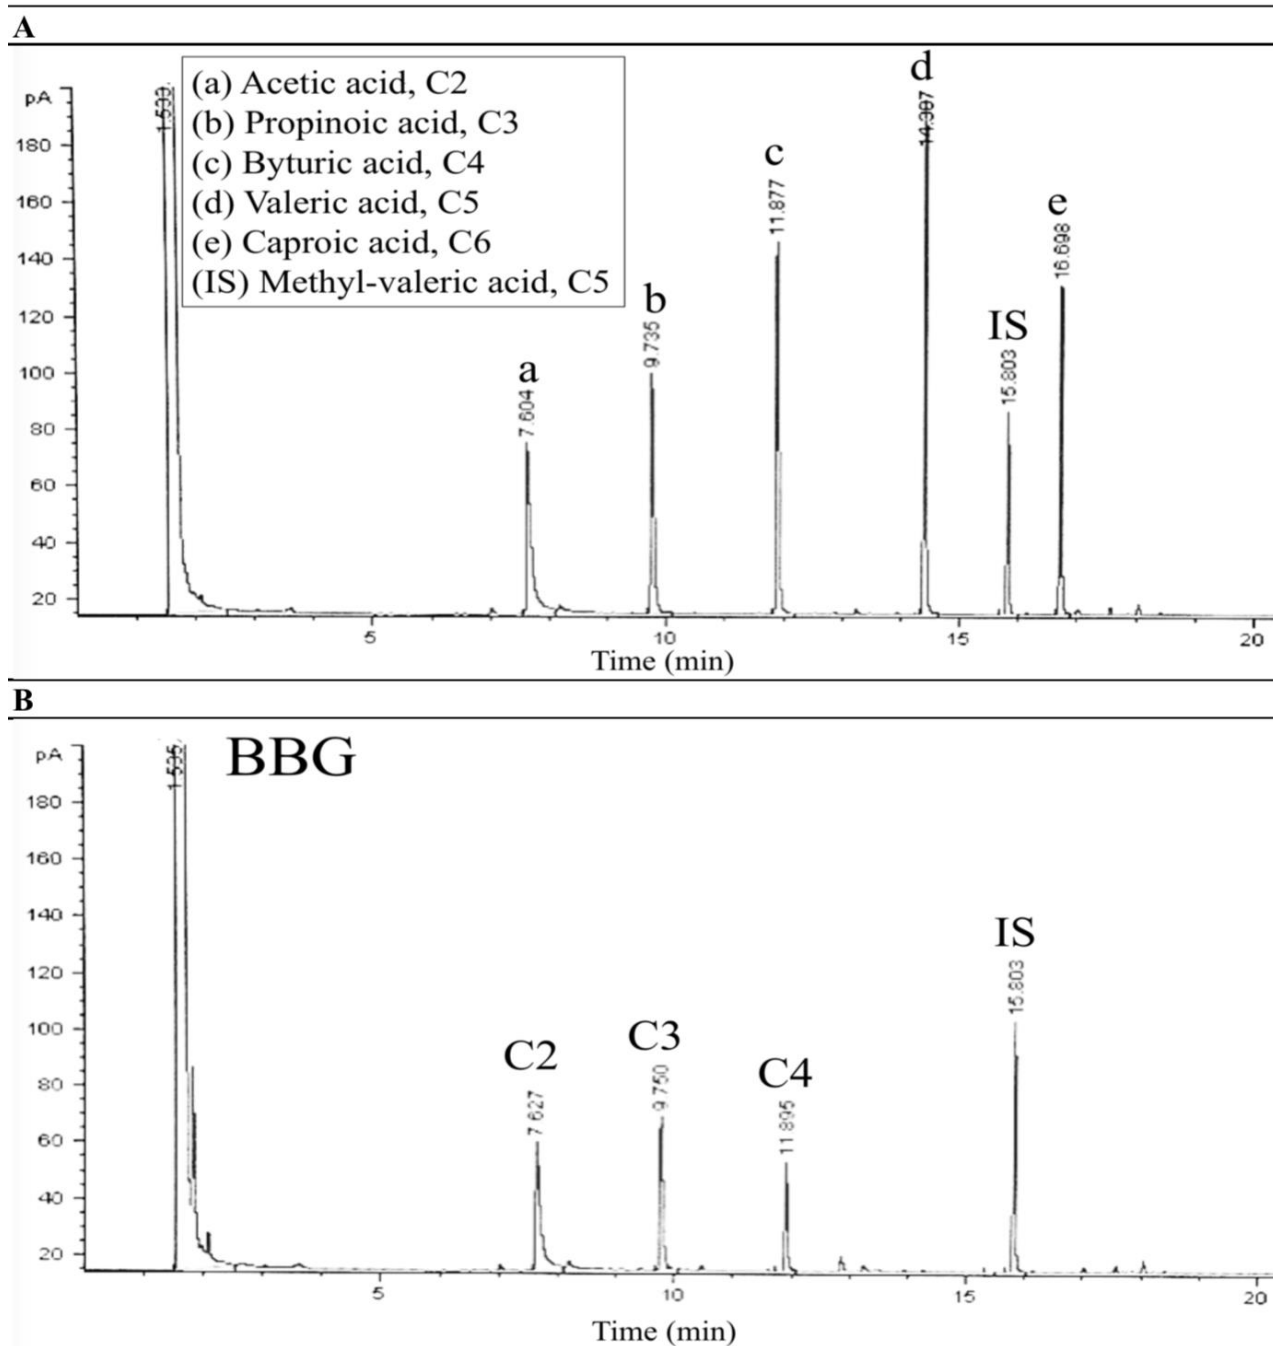

**Figure 3. GC-FID chromatograms** (A) Short chain fatty acid external standards, C2, C3, C4, C5, C6 and internal standard, methyl-valeric acid; (B) short chain fatty acid profiles of the BBG after 40 h of fermentation.

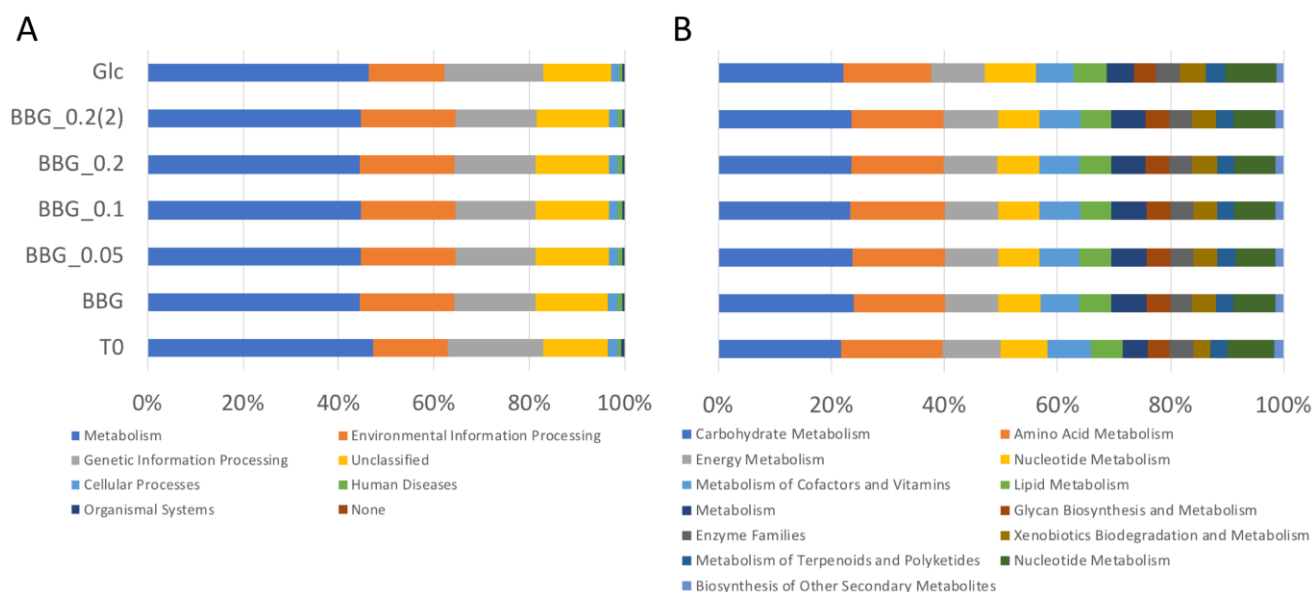

**Figure 4.** Overall distribution of metagenome KEGG prediction output of the infant fecal fermentation of 5 BBG samples, glucose monomer and T0 group using PICRUSt. (A) KEGG level 1 class distribution; (B) expanded KEGG level 2 class distribution from level 1 "Metabolism" group.

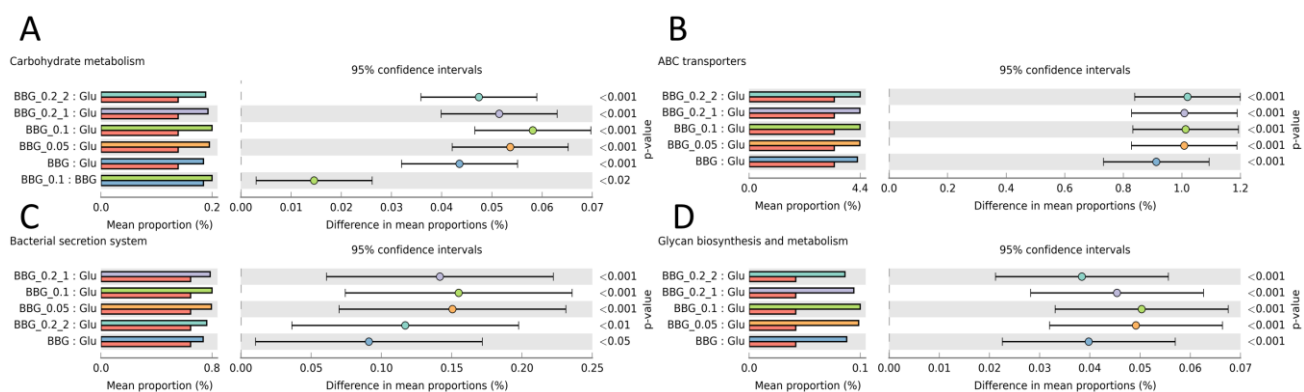

**Figure 5.** Selected metagenome KEGG prediction output of the infant fecal fermentation of 5 BBG samples and glucose monomer using PICRUSt and statistically analysis using STAMP. (A) Carbohydrate metabolism; (B) ABC transporters; (C) Bacterial secretion system; and (D) Glycan biosynthesis and metabolism.

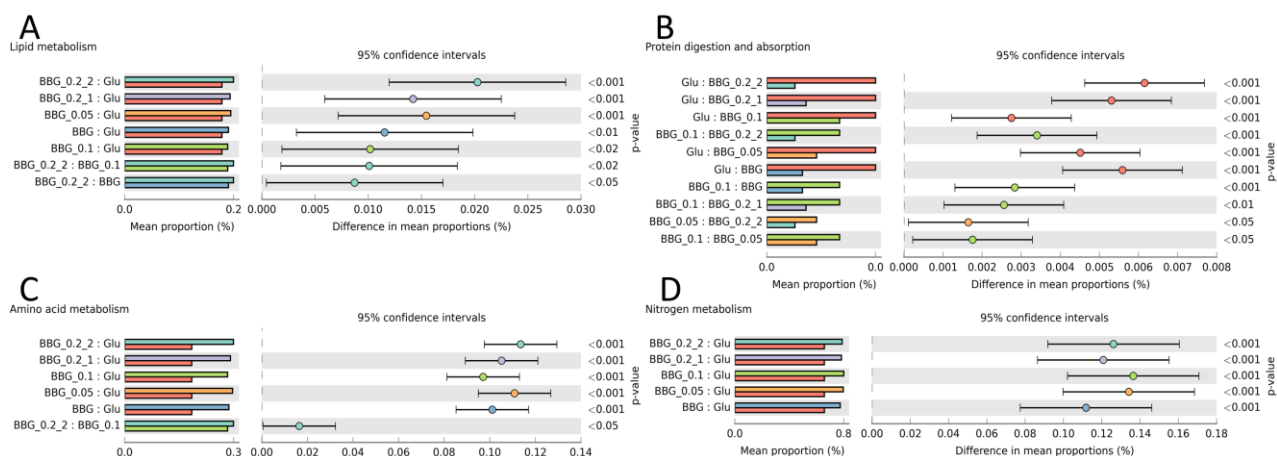

**Figure 6.** Selected metagenome KEGG prediction output of the infant fecal fermentation of 5 BBG samples and glucose monomer using PICRUSt and statistically analysis using STAMP. (A) Lipid

metabolism; (B) Protein digestion and absorption; (C) Amino acid metabolism; and (D) Nitrogen metabolism.
